# Supplementary material for: Cancer cell line-specific protein profiles in extracellular vesicles identified by proteomics
Source: PubMed Central journal article supplement (PMC7473518; doi:10.1371/journal.pone.0238591), 2020-09-04
Supplement: pone.0238591.s002.pdf [file pone.0238591.s002.pdf]

Supplementary Table 2:

List of the 30 most commonly reported proteins in EV studies, as described in Vesiclepedia database, present in the vesicles isolated from the supernatant of E10, BxPC3 and H3 cell lines and their relative abundance (Spectral counts, SC)

| Gene name | Protein description                                  | Average SC |       |       |
|-----------|------------------------------------------------------|------------|-------|-------|
|           |                                                      | Cell Line  |       |       |
|           |                                                      | E10        | BxPC3 | H3    |
| PDCD6IP   | Programmed cell death 6-interacting protein          | 51,3       | 58,7  | 78    |
| GAPDH     | Glyceraldehyde-3-phosphate dehydrogenase             | 79,7       | 93    | 156,3 |
| HSPA8     | Heat shock cognate 71 kDa protein                    | 54,3       | 57,3  | 104,3 |
| ACTG1     | Actin, cytoplasmic 2                                 | 128        | 99    | 115   |
| ANXA2     | Annexin A2                                           | 90         | 51,3  | 31,7  |
| CD9       | CD9 antigen                                          | 24,7       | 17,7  | 4     |
| PKM       | Pyruvate kinase PKM                                  | 82,7       | 134,7 | 103,7 |
| HSP90AA1  | Heat shock protein HSP 90-alpha                      | 55         | 53    | 98    |
| ENO1      | Alpha-enolase                                        | 58,7       | 57    | 62,7  |
| ANXA5     | Annexin A5                                           | 31,3       | 12    | 29,3  |
| HSP90AB1  | Heat shock protein HSP 90-beta                       | 31,7       | 26    | 54,3  |
| CD63      | CD63 antigen                                         | 0          | 0     | 4,7   |
| YWHAZ     | 14-3-3 protein zeta/delta                            | 35,3       | 17    | 21    |
| YWHAE     | 14-3-3 protein epsilon                               | 28         | 5,3   | 7     |
| EEF1A1    | Elongation factor 1-alpha 1                          | 24,3       | 32,7  | 32,7  |
| PGK1      | Phosphoglycerate kinase 1                            | 52,3       | 79,7  | 72,3  |
| CLTC      | Clathrin heavy chain 1                               | 89         | 98,3  | 129   |
| PPIA      | Peptidyl-prolyl cis-trans isomerase A                | 33,3       | 27    | 37,7  |
| SDCBP     | Syntenin-1                                           | 30         | 32,3  | 61    |
| ALDOA     | Fructose-bisphosphate aldolase A                     | 37,7       | 20,3  | 21    |
| EEF2      | Elongation factor 2                                  | 52         | 69    | 71,3  |
| ALB       | Serum albumin                                        | 21,7       | 9,7   | 5,7   |
| TPI1      | Triosephosphate isomerase                            | 35,3       | 28    | 26,7  |
| VCP       | Transitional endoplasmic reticulum ATPase            | 14,3       | 15,3  | 17,3  |
| CFL1      | Cofilin-1                                            | 19,3       | 9,3   | 12    |
| MSN       | Moesin                                               | 93,3       | 60,3  | 60    |
| ATP1A1    | Sodium/potassium-transporting ATPase subunit alpha-1 | 69         | 32    | 31    |
| PRDX1     | Peroxiredoxin-1                                      | 13,3       | 14,7  | 17    |
| MYH9      | Myosin-9                                             | 142,3      | 60,3  | 89,7  |
| EZR       | Ezrin                                                | 34,7       | 41,3  | 9     |
