# Supplementary material for: Cancer cell line-specific protein profiles in extracellular vesicles identified by proteomics
Source: PubMed Central journal article supplement (PMC7473518; doi:10.1371/journal.pone.0238591), 2020-09-04
Supplement: pone.0238591.s003.pdf [file pone.0238591.s003.pdf]

Supplementary table 1:

EVs isolated from cell culture supernatants of E10, BxPC3, and H3, contain proteins shown to modulate tumor and metastatic environment.

| Gene name | Protein description                      | Function                                                                                                                                                                                                                                                   | Cell Line (Spectral counts) |       |       |
|-----------|------------------------------------------|------------------------------------------------------------------------------------------------------------------------------------------------------------------------------------------------------------------------------------------------------------|-----------------------------|-------|-------|
|           |                                          |                                                                                                                                                                                                                                                            | E10                         | BxPC3 | H3    |
| ADAM10    | S-100 calcium binding protein A10        | Contributes to cell migration and proliferation                                                                                                                                                                                                            | 12,7                        | 5,7   | 0     |
| ALCAM     | CD166 ligand                             | Cell adhesion molecule                                                                                                                                                                                                                                     | 21,7                        | 17    | 0     |
| CDC42     | Cell division control protein 42 homolog | RegulateS the dynamic organization of the cytoskeleton and membrane trafficking for physiologic processes, such as cell proliferation, motility, polarity, cytokinesis and cell growth                                                                     | 15,3                        | 14    | 7,7   |
| CSPG4     | Chondroitin sulfate proteoglycan 4       | Involved in cell proliferation and migration; may participate in melanoma cells invasion properties.                                                                                                                                                       | 34                          | 4     | 96,3  |
| CTNNA1    | Catenin alpha-1                          | Involved in cell adhesion; may play a role in cell differentiation                                                                                                                                                                                         | 68,3                        | 26,7  | 25,7  |
| EGFR      | Epidermal growth factor receptor         | Activates at least 4 major downstream signaling cascades including the RAS-RAF-MEK-ERK, PI3 kinase-AKT, PLCgamma-PKC and STATs modules; Promotes cancer cell proliferation                                                                                 | 158,3                       | 26,30 | 1,5   |
| FN1       | Fibronectin                              | Involved in cell adhesion, cell motility, opsonization, wound healing, and maintenance of cell shape                                                                                                                                                       | 99,3                        | 12    | 137,3 |
| ICAM      | Intercellular adhesion molecule          | Angiogenesis                                                                                                                                                                                                                                               | 55                          | 9,3   | 2,3   |
| ITGA2     | Integrin, alpha 2                        | Member of the integrin adhesion receptors family; promotes intracellular signaling and tumor cell proliferation, migration and survival; when forming a heterodimer alpha2beta1 is crucial for angiogenesis.                                               | 57                          | 15    | 2     |
| ITGA3     | Integrin alpha-3                         | Member of the integrin adhesion receptors family; promotes intracellular signaling and tumor cell proliferation, migration and survival; when forming the heterodimer alpha3beta1 increases migration of colon cancer cells                                | 58,7                        | 15,7  | 17,7  |
| ITGA5     | Integrin, alpha 5                        | Member of the integrin adhesion receptors family; promotes intracellular signaling and tumor cell proliferation, migration and survival; the heterodimer alpha5beta1 is involved in the increased migration of colon cancer cells.                         | 31                          | 5,7   | 0     |
| ITGA6     | Integrin alpha-6                         | Member of the integrin adhesion receptors family; promotes intracellular signaling and tumor cell proliferation, migration and survival; $\alpha6\beta4$ and $\alpha6\beta1$ heterodimers mediate cancer cell motility and metastasis                      | 66,3                        | 31,7  | 0     |
| ITGB1     | Integrin beta-1                          | Member of the integrin adhesion receptors family; Dimerizes with many other member of the integrin family, thus is involved in processes such as cell adhesion, cell motility and angiogenesis, and matrix degradation processes, promoting cell invasion. | 68,3                        | 19,3  | 25,3  |
| ITGB4     | Integrin, beta 4                         | Member of the integrin adhesion receptors family; promotes intracellular signaling and tumor cell proliferation, migration and survival; required for the regulation of keratinocyte polarity and motility.                                                | 140,7                       | 65    | 0     |
| LEG 1     | Galectin 1                               | Immunosuppressive                                                                                                                                                                                                                                          | 23,3                        | 7,7   | 16,7  |
| LOXL2     | Lysyl oxidase homolog 2                  | Involved in EMT and subsequent EMT induction; may play a role in tumor progression; inhibits keratinocyte differentiation                                                                                                                                  | 20,3                        | 7,3   | 3,3   |
| LOXL3     | Lysyl oxidase homolog 3                  | Invasion, metastatic potential                                                                                                                                                                                                                             | 0                           | 0     | 39,7  |

|         |                                           |                                                                                                                                                                                                                                                                                  |             |              |             |
|---------|-------------------------------------------|----------------------------------------------------------------------------------------------------------------------------------------------------------------------------------------------------------------------------------------------------------------------------------|-------------|--------------|-------------|
| MFGE8   | Lactadherin                               | Angiogenesis MFG-E8 Drives Melanoma Growth by Stimulating Mesenchymal Stromal Cell–Induced Angiogenesis and M2 Polarization of Tumor-Associated Macrophages ; Extracellular vesicles including exosomes are mediators of signal transduction: are they protective or pathogenic? | <b>47,3</b> | <b>29,7</b>  | <b>60,7</b> |
| MIF     | Macrophage migration inhibitory factor    | Inflammation (Exosomes in inflammation and role as biomarkers)                                                                                                                                                                                                                   | <b>14</b>   | <b>7</b>     | <b>7,7</b>  |
| Muc1    | Mucin-1                                   | Involved in cellular contact and signaling; Involved in the dysregulated proliferation of tumor cells                                                                                                                                                                            | <b>11</b>   | <b>35</b>    | <b>0</b>    |
| Muc4    | Mucin-4                                   | May play a role in tumor progression repressing apoptosis as opposed to proliferation; plays an important role in cell proliferation and differentiation of epithelial cells                                                                                                     | <b>5,3</b>  | <b>43,3</b>  | <b>0</b>    |
| Muc5AC  | Mucin 5 AC                                | Escape of cancer cells from immunosurveillance/immunosuppressive agent                                                                                                                                                                                                           | <b>89,7</b> | <b>406,7</b> | <b>13,7</b> |
| Muc18   | Cell surface glycoprotein MUC18           | Role in cell adhesion, and in cohesion of the endothelial monolayer at intercellular junctions. May allow melanoma cells to interact with cellular elements of the vascular system                                                                                               | <b>4</b>    | <b>0</b>     | <b>14</b>   |
| PMEL    | Melanocyte protein PMEL                   | Could protect tumor cells from antibody mediated immunity.                                                                                                                                                                                                                       | <b>0</b>    | <b>0</b>     | <b>26,3</b> |
| S100A9  | S-100 calcium binding protein A9          | Involved in inflammatory events and the development of metastatic disease                                                                                                                                                                                                        | <b>15,3</b> | <b>9,3</b>   | <b>0</b>    |
| S100A14 | S-100 calcium binding protein A14         | Modulates P53/TP53 protein levels, thus regulates cell survival and apoptosis; can promote cell proliferation or apoptosis.                                                                                                                                                      | <b>8,7</b>  | <b>10</b>    | <b>0</b>    |
| THBS1   | Thrombospondin-1                          | TSP1 regulates diverse processes such as adhesion, invasion, migration, proliferation, apoptosis, immunity response and treatment response by interacting with multiple ligands                                                                                                  | <b>15,3</b> | <b>53</b>    | <b>0</b>    |
| TIMP-1  | Metalloproteinase inhibitor 1             | Metalloproteinase inhibitor promotion of growth and survival of different transformed and tumoral cells                                                                                                                                                                          | <b>8,7</b>  | <b>11,7</b>  | <b>3,7</b>  |
| TINAGL1 | Tubulointerstitial nephritis antigen-like | Cell Adhesion molecule                                                                                                                                                                                                                                                           | <b>52,7</b> | <b>58</b>    | <b>2</b>    |
| TNC     | Tenascin C                                | Extracellular matrix protein; in tumors, stimulates angiogenesis by elongation, migration and sprouting of endothelial cells                                                                                                                                                     | <b>63</b>   | <b>0</b>     | <b>51</b>   |
| VIM     | Vimentin                                  | Maintains cell integrity; overexpression is frequently associated with increased migratory/invasive capacity of cancer cells; Canonical marker of EMT                                                                                                                            | <b>0</b>    | <b>0</b>     | <b>46,7</b> |
